# Supplementary material
Source: PubMed Central journal article supplement (PMC7052154)
Supplement: 41416_2019_665_MOESM1_ESM.pdf [file 41416_2019_665_MOESM1_ESM.pdf]

# Transcriptomic analysis of human primary breast cancer identifies fatty acid oxidation as a target for metformin

## SUPPLEMENTAL FIGURES:

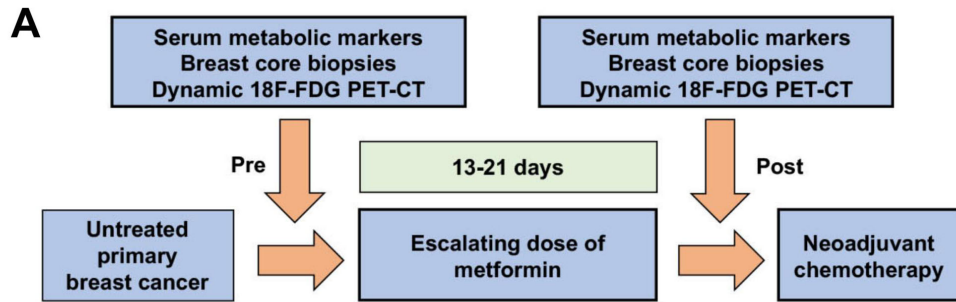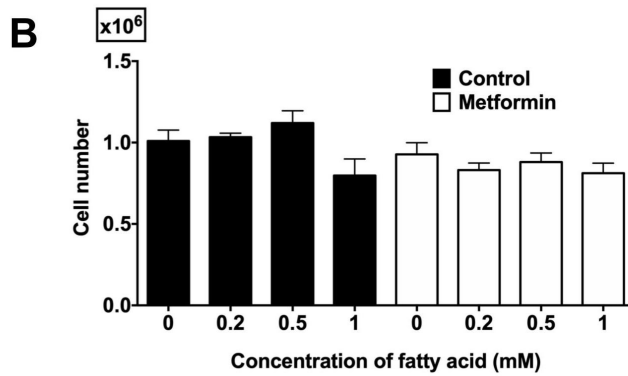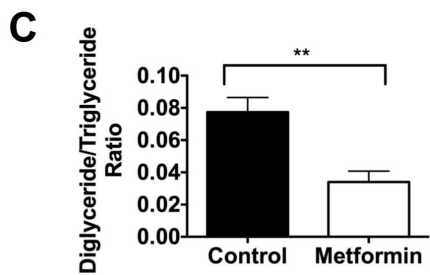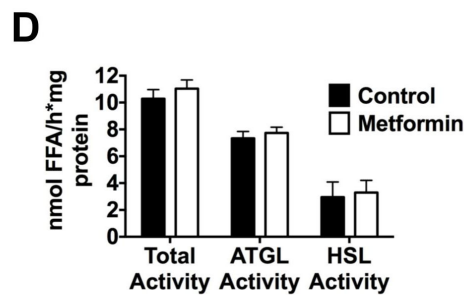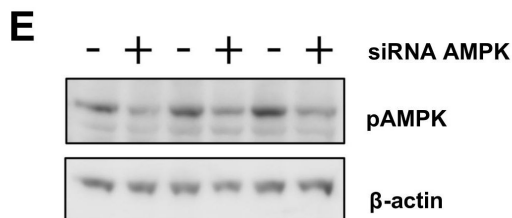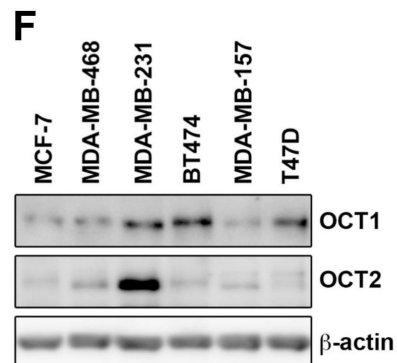

**Fig S1.** (A): Schema for pharmacodynamic clinical study (B): Effect of the addition of a mixture of fatty acids at a concentration of 0.2mM, 0.5mM and 1mM (oleate, palmitate and linoleate in a ratio of 45%, 30% and 25%, respectively) on proliferation of MCF7 cells with and without 2mM metformin (n=4). (C): Effect of metformin on the diglyceride to triglyceride ratio in MCF7 cells (n=5). (D): Effect of metformin on adipose triglyceride lipase (ATGL) and hormone sensitive lipase (HSL) activity (n=3). (E): Phosphorylation of AMPK in MCF7 cells at 72 hours after siRNA knockdown of the PRKAA1 and PRKAA2 subunits of AMPK. (F): Expression of OCT-1 and OCT-2 in all 6 cell lines. Data shown are mean  $\pm$  SEM. \*P < 0.05; \*\*P < 0.01; \*\*\*P < 0.001.

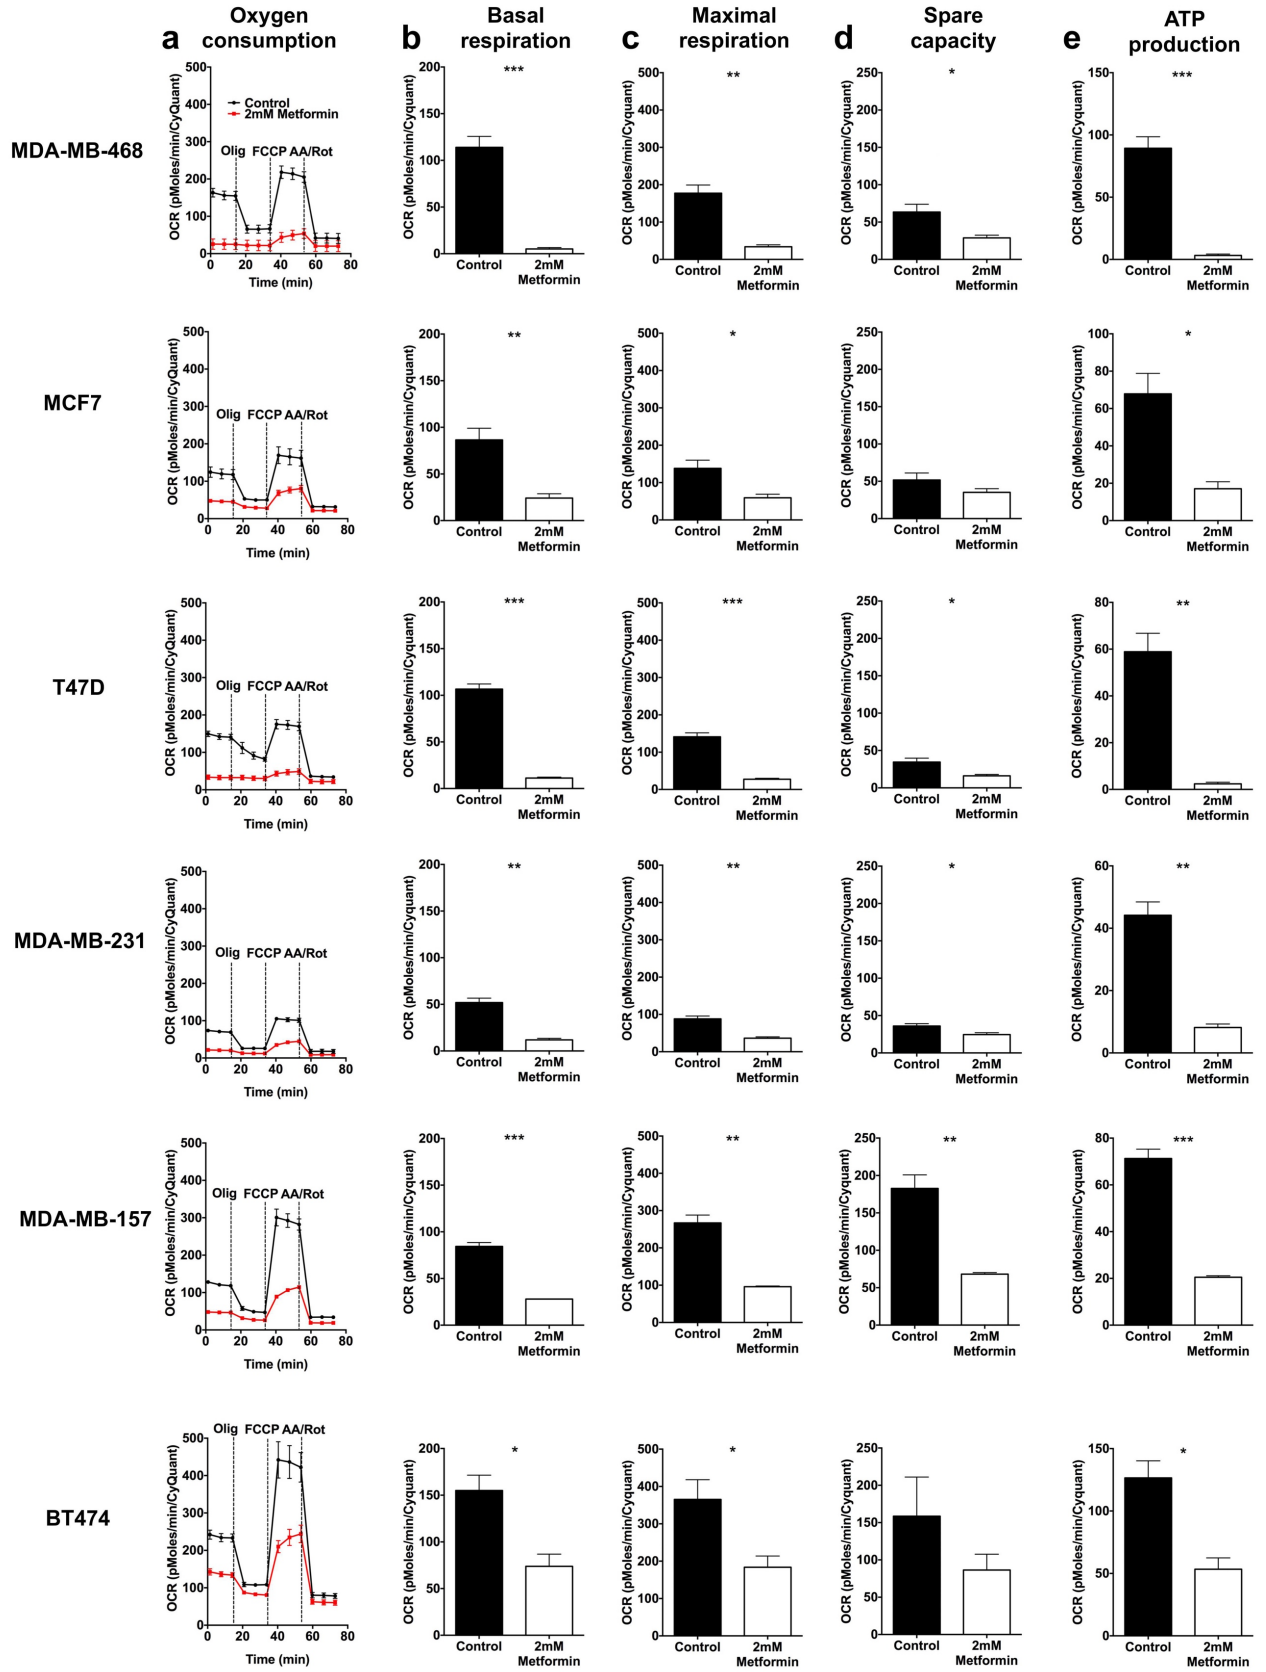

**Fig S2. (A):** Effect of 0 and 2mM metformin on oxygen consumption in all 6 cell lines. **(B-E):** Parameters of mitochondrial function determined from the same experiment. The oxygen consumption rate (OCR) prior to the addition of mitochondrial stressor agents is the basal respiration. The OCR measured after the injection of Mesoxalonitrile 4-trifluoromethoxyphenylhydrazine (FCCP) (which depolarizes the plasma and mitochondrial membranes uncoupling oxidative phosphorylation) is the maximal respiration. The spare capacity is the difference between maximal respiration and basal respiration. The addition of oligomycin blocks ATP synthase and any subsequent fall in the OCR correlates with ATP production. Data shown are mean  $\pm$  SEM \* $p < 0.05$ ; \*\* $p < 0.01$ ; \*\*\* $p < 0.001$  ( $n = 3$  for all experiments).

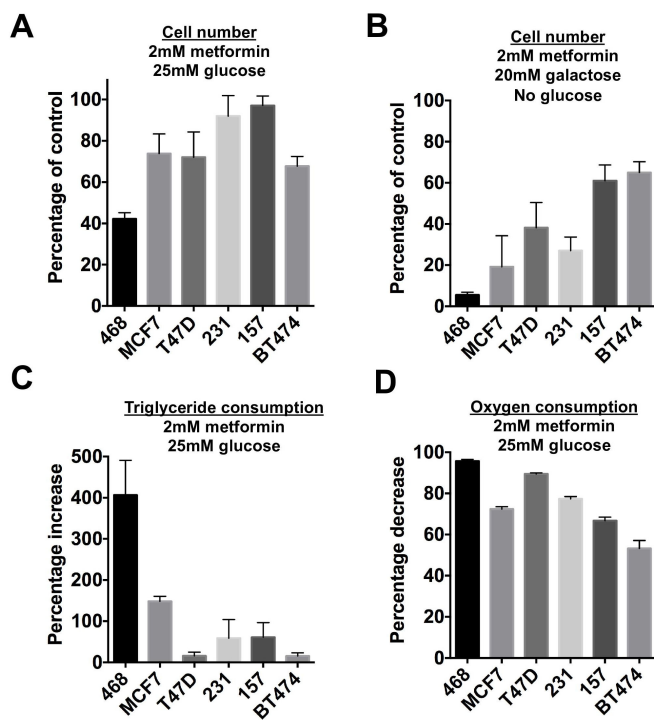

**Fig S3.** Percentage of cell number compared to control following 96 hours of treatment with 2mM metformin in media supplemented with **(A):** 25mM glucose **(B):** 20mM galactose but no glucose. **(C):** Percentage increase in triglyceride accumulation compared to control following 96 hours of treatment with 2mM metformin in media supplemented with 25mM glucose. **(D):** Percentage

decrease in oxygen consumption compared to control following 96 hours of treatment with 2mM metformin in media supplemented with 25mM glucose.

SUPPLEMENTAL TABLES:

| Pathway                                 | KEGG ID | p-value* |
|-----------------------------------------|---------|----------|
| Steroid biosynthesis                    | 00100   | <0.00001 |
| Fatty acid degradation                  | 00071   | 0.005    |
| Biosynthesis of unsaturated fatty acids | 01040   | 0.003    |
| PPAR signaling pathway                  | 03320   | 0.030    |
| Glycosphingolipid synthesis             | 00601   | 0.041    |
| Arachidonic acid metabolism             | 00590   | 0.003    |
| Glycosphingolipid synthesis             | 00604   | 0.005    |
| Glycerophospholipid metabolism          | 00564   | 0.019    |

**Table S1.** List of KEGG pathways linked to lipid metabolism that were significantly up or downregulated following metformin treatment (all tumours): Red = up-regulated, Blue = down-regulated.

\* corrected Hypergeometric p-value.

SUPPLEMENTAL METHODS:

*Measurements of total lipase activity*

ATGL and HSL activity was measured as previously described by Das et al (Das et al., 2011) with minor modifications. 80µg of cell lysate was used for the assay. Positive controls of liver and white adipose

tissue were used. ATGL activity was determined by the addition of a hormone sensitive lipase (HSL) inhibitor and HSL activity was determined by subtraction of HSL inhibited lipase activity from total lipase activity.

#### *AMPK knockdown*

AMPK $\alpha$ 1 (PRKAA1 On-TAplus SMART pool duplex, Dharmacon) and AMPK $\alpha$ 2 (PRKAA2 On-TAplus SMART pool duplex, Dharmacon) were used for AMPK siRNA knockdown. siRNAs were transfected into MCF7 cells using Lipofectamine RNAiMax following the manufacturer's instructions (Invitrogen). On-TAplus non-targeting pool (Dharmacon) was used as a negative control.

#### *Immunoblotting*

Cell lysates were separated on 10% SDS-PAGE and transferred to a polyvinylidene difluoride membrane. The following primary antibodies were used pAMPK $\alpha$ (Thr172) and OCT-1 (#2535 and #8157, respectively, all Cell Signalling, USA), OCT-2 (ab198800, Abcam, UK) and  $\beta$ -actin (Sigma, UK).

#### *Oxygen consumption assays*

Oxygen consumption rate (OCR) was measured at 37°C using XF96 extracellular analyzer (Seahorse biosciences). Dependent upon the cell lines 17,500-20,000 cells were seeded per well on a 96 well plate and left to recover for 24 h prior to a media change with metformin added at varying concentrations as specified in the text. After metformin treatment overnight the cells were assayed using the XF96 extracellular flux analyser (Seahorse Bioscience). Prior to the assay, cells are prewashed 3 times with XF assay medium supplemented with 25 mM glucose, 4 mM glutamine, 1 mM pyruvate and metformin, and then equilibrated in XF assay medium at 37°C in a non-CO<sub>2</sub> incubator for 1 hour. All the medium is adjusted to pH 7.4 on the day of the assay. Three baseline measurements of OCR were taken before sequential injection of mitochondrial inhibitors. The respiratory chain inhibitors are ATP synthase complex inhibitor oligomycin, ATP synthesis uncoupler Carbonyl cyanide-*p*-trifluoromethoxyphenylhydrazone (FCCP), complex I inhibitor rotenone and complex III inhibitor antimycin A.
